# Supplementary material
Source: publisher figshare collection journal article supplement (https://acs.figshare.com/ndownloader/files/14326847)
Supplement: Supplementary file 1 [file 14326847]

Supporting Information  
of  
Synthesis and Aggregation Behavior of Poly(arylene alkenylene)s  
and Poly(arylene alkylene)s Having Dialkoxyphenylene and  
Aromatic Diimide Groups

*Li Yi Tan*, <sup>†</sup> *Yoshitaka Tsuchido*, <sup>†</sup> *Kohtaro Osakada*, <sup>†</sup> *Zhengguo Cai*, <sup>¶</sup>  
*Yoshiaki Takahashi*<sup>§</sup>, and *Daisuke Takeuchi*, <sup>\*,†,‡</sup>

<sup>†</sup> Laboratory for Chemistry and Life Science, Tokyo Institute of Technology, R1-03, 4259 Nagatsuta, Yokohama 226-8503, JAPAN

<sup>¶</sup> State Key Laboratory for Modification of Chemical Fibers and Polymer Materials, College of Materials Science and Engineering, Donghua University, Shanghai 201620, People's Republic of China

<sup>§</sup> Institute for Materials Chemistry and Engineering, and Department of Molecular and Materials Sciences, Kyushu University, 6-1 Kasuga-koen, Kasuga, Fukuoka 816-8580, JAPAN

<sup>‡</sup> Department of Frontier Materials Chemistry, Graduate School of Science and Technology, Hirosaki University, 3 Bunkyo-cho, Hirosaki, Aomori 036-8561, JAPAN

|                    |                                                                                                                                                                                            |    |
|--------------------|--------------------------------------------------------------------------------------------------------------------------------------------------------------------------------------------|----|
| <b>Figure S1.</b>  | <sup>1</sup> H NMR spectra (a) of poly( <b>1a-IA</b> ) before Soxhlet extraction (b) of a soluble fraction of the polymer obtained by Soxhlet extraction for 20 h using THF as the solvent | 1  |
| <b>Figure S2.</b>  | <sup>1</sup> H NMR spectrum of poly( <b>1b-IA</b> )                                                                                                                                        | 2  |
| <b>Figure S3.</b>  | <sup>13</sup> C{ <sup>1</sup> H} NMR spectrum of poly( <b>1b-IA</b> )                                                                                                                      | 2  |
| <b>Figure S4.</b>  | <sup>1</sup> H NMR spectrum of poly( <b>1a-IIA</b> )                                                                                                                                       | 3  |
| <b>Figure S5.</b>  | <sup>1</sup> H NMR spectrum of poly( <b>1c-IA</b> )                                                                                                                                        | 3  |
| <b>Figure S6.</b>  | <sup>1</sup> H NMR spectrum of poly( <b>1b-IA-H</b> )                                                                                                                                      | 4  |
| <b>Figure S7.</b>  | <sup>13</sup> C{ <sup>1</sup> H} NMR spectrum of poly( <b>1b-IA-H</b> )                                                                                                                    | 4  |
| <b>Figure S8.</b>  | <sup>1</sup> H NMR spectrum of poly( <b>1c-IA-H</b> )                                                                                                                                      | 5  |
| <b>Figure S9.</b>  | <sup>13</sup> C{ <sup>1</sup> H} NMR spectrum of poly( <b>1c-IA-H</b> )                                                                                                                    | 5  |
| <b>Figure S10.</b> | <sup>1</sup> H NMR spectrum of poly( <b>1a-IIA-H</b> )                                                                                                                                     | 6  |
| <b>Figure S11.</b> | <sup>13</sup> C{ <sup>1</sup> H} NMR spectrum of poly( <b>1a-IIA-H</b> )                                                                                                                   | 6  |
| <b>Figure S12.</b> | MALDI-TOF Mass of poly( <b>1a-IA</b> )                                                                                                                                                     | 7  |
| <b>Figure S13.</b> | MALDI-TOF Mass of poly( <b>1a-IIA</b> )                                                                                                                                                    | 8  |
| <b>Figure S14.</b> | (a)ESI-MS spectrum of poly( <b>1a-IA</b> ). (b) Observed isotope pattern for 1:1 adduct of <b>1a</b> and <b>IA</b> . (c) Calculated isotope pattern for the cyclic 1:1 adduct.             | 9  |
| <b>Figure S15.</b> | (a)ESI-MS spectrum of poly( <b>1a-IIA</b> ). (b) Observed isotope pattern for 1:1 adduct of <b>1a</b> and <b>IIA</b> . (c) Calculated isotope pattern for the cyclic 1:1 adduct.           | 12 |
| <b>Figure S16.</b> | Results of light scattering measurement for poly( <b>1a-IC</b> ).                                                                                                                          | 14 |
| <b>Figure S17.</b> | WXR for poly( <b>1a-IC</b> )                                                                                                                                                               | 15 |

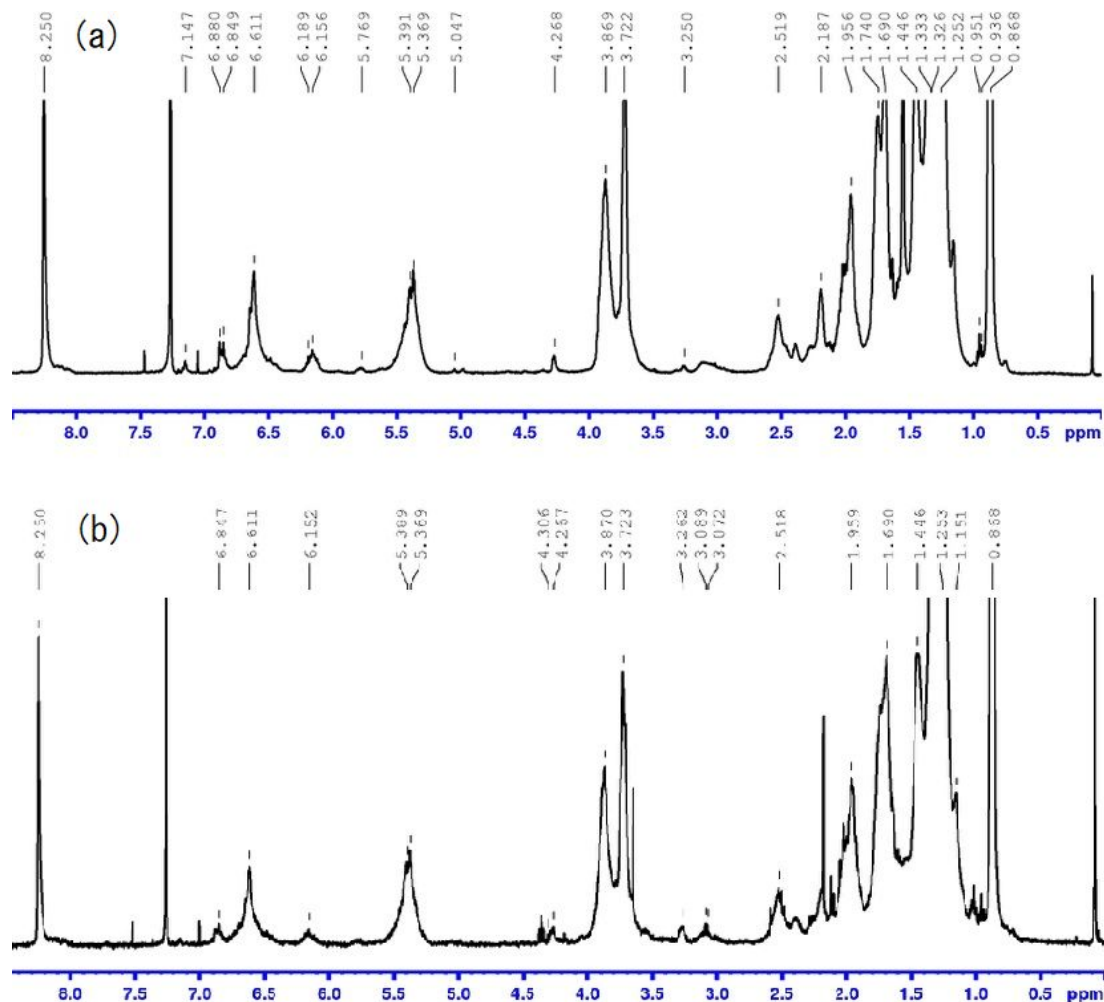

**Figure S1.** <sup>1</sup>H NMR spectra of poly(1a-IA) (a) before Soxhlet extraction ( $M_n = 7600$ , PDI = 4.6) (500 MHz,  $CDCl_3$ , r.t), (b) of soluble fraction obtained by Soxhlet extraction for 20 h using THF as the solvent ( $M_n = 5100$ , PDI = 2.7) (500 MHz,  $CDCl_3$ , r.t).

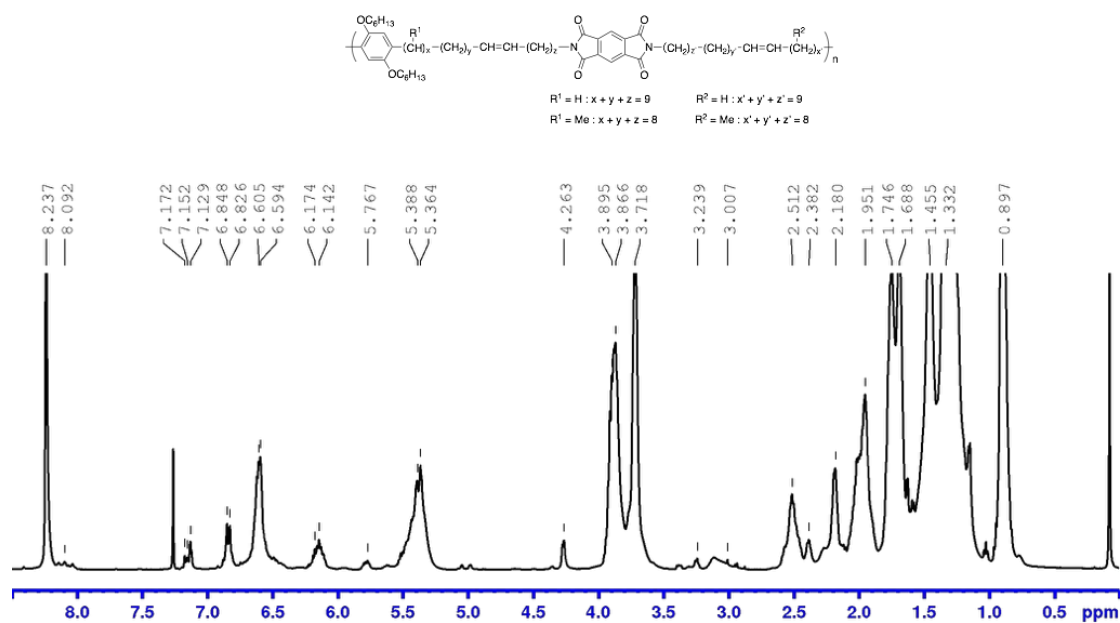

**Figure S2.**  $^1\text{H}$  NMR spectrum of poly(**1b-IA**) (500 MHz,  $\text{CDCl}_3$ , r.t.).

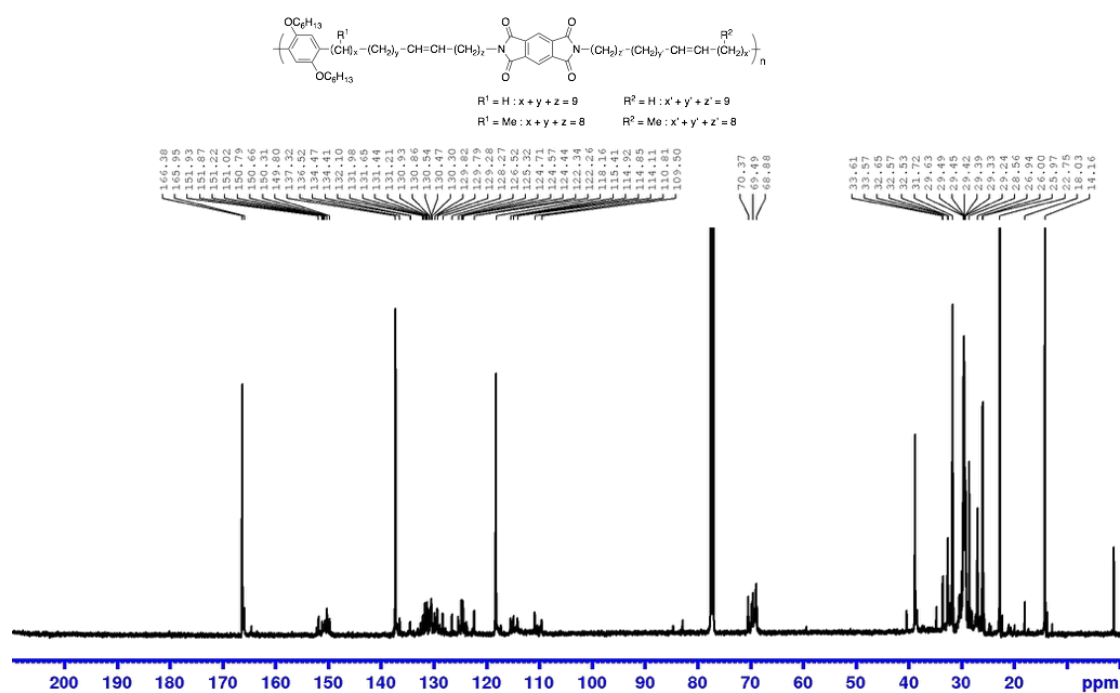

**Figure S3.**  $^{13}\text{C}\{^1\text{H}\}$  NMR spectrum of poly(**1b-IA**) (125 MHz,  $\text{CDCl}_3$ , r.t.).

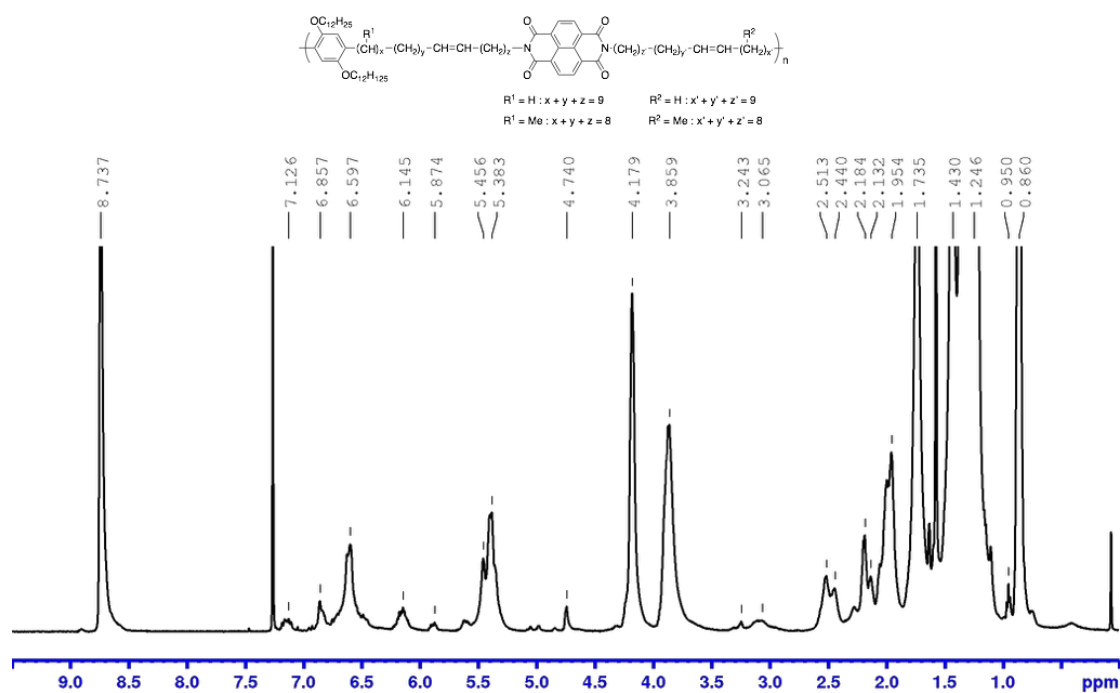

**Figure S4.**  $^1H$  NMR spectrum of poly(1a-IIA) (500 MHz,  $CDCl_3$ , r.t.).

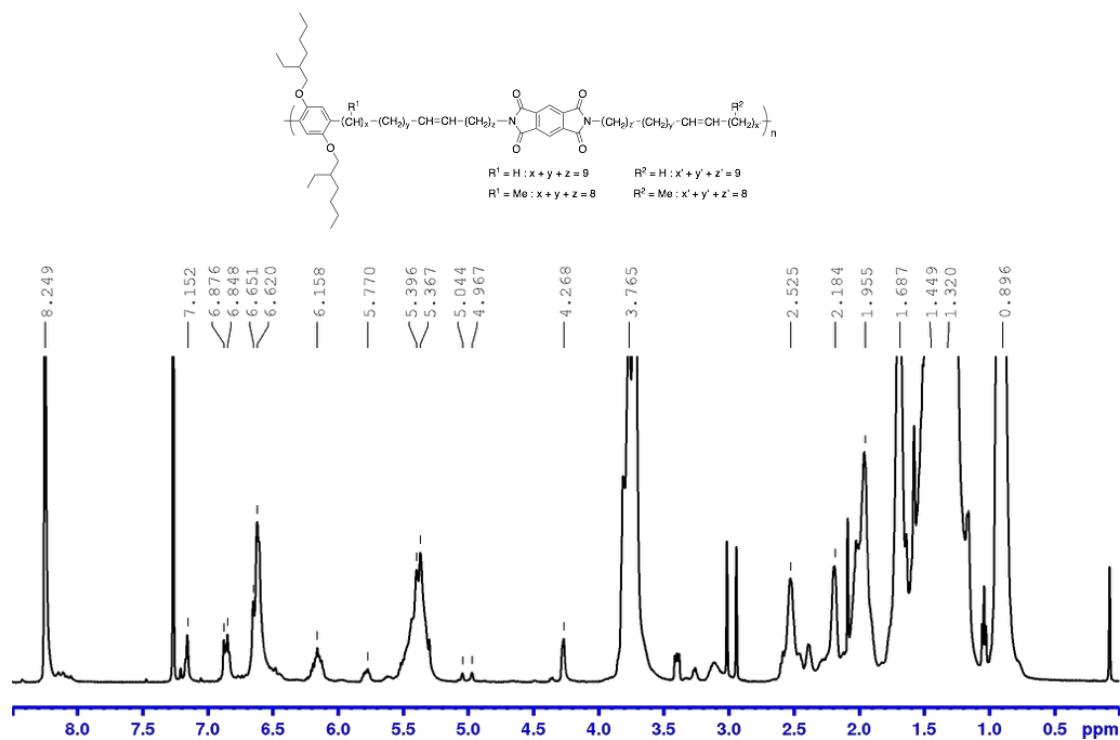

**Figure S5.**  $^1H$  NMR spectrum of poly(1c-IA) (500 MHz,  $CDCl_3$ , r.t.).

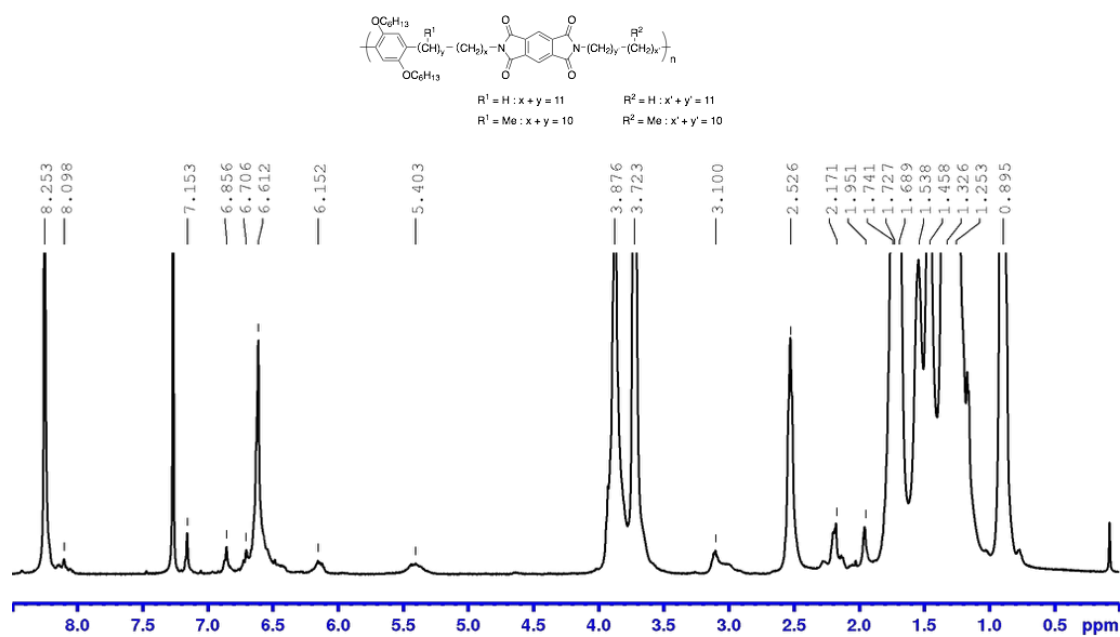

**Figure S6.** <sup>1</sup>H NMR spectrum of poly(**1b-IA-H**) (500 MHz, CDCl<sub>3</sub>, r.t.).

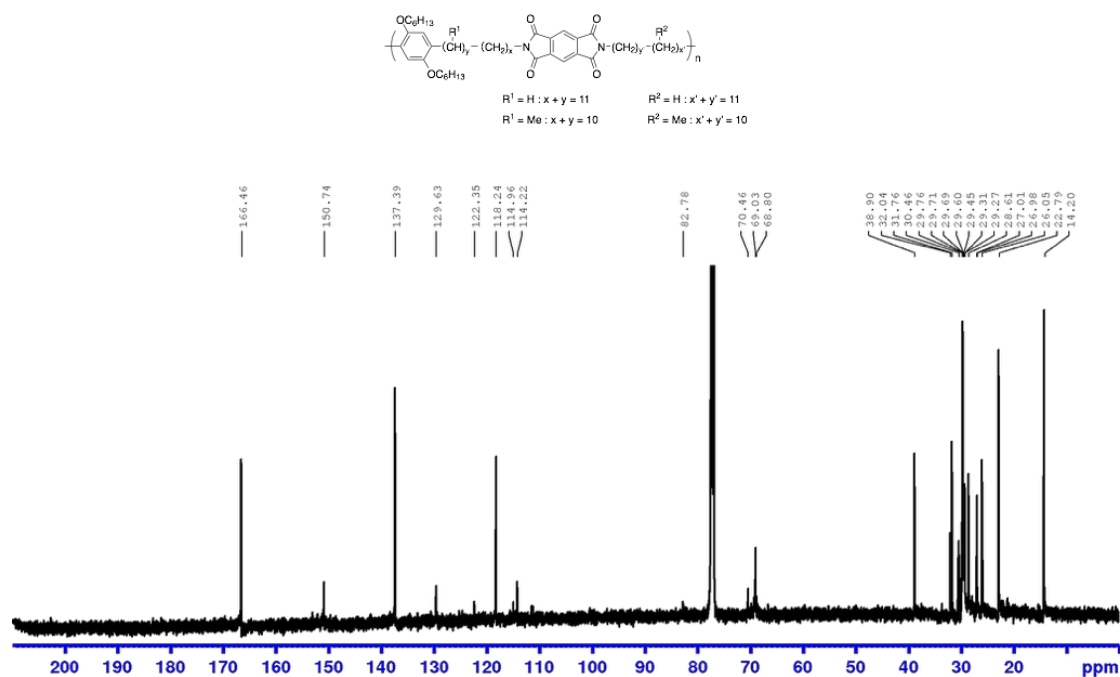

**Figure S7.** <sup>13</sup>C{<sup>1</sup>H} NMR spectrum of poly(**1b-IA-H**) (125 MHz, CDCl<sub>3</sub>, r.t.).

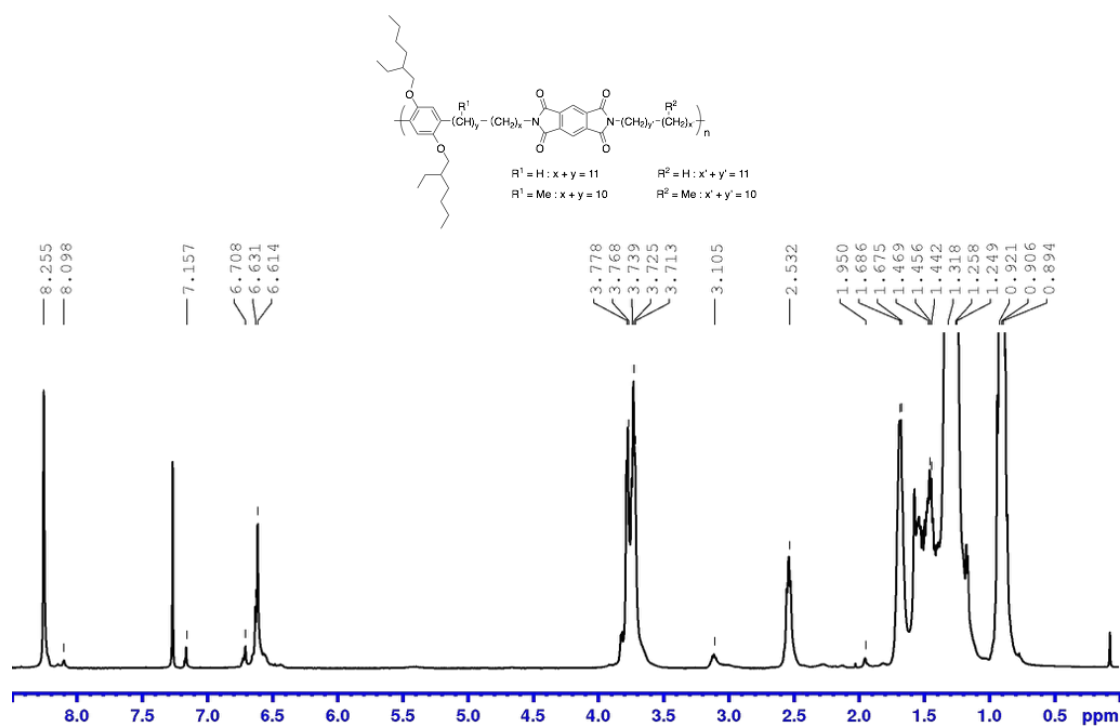

**Figure S8.**  $^1H$  NMR spectrum of poly(1c-IA-H) (500 MHz,  $CDCl_3$ , r.t.).

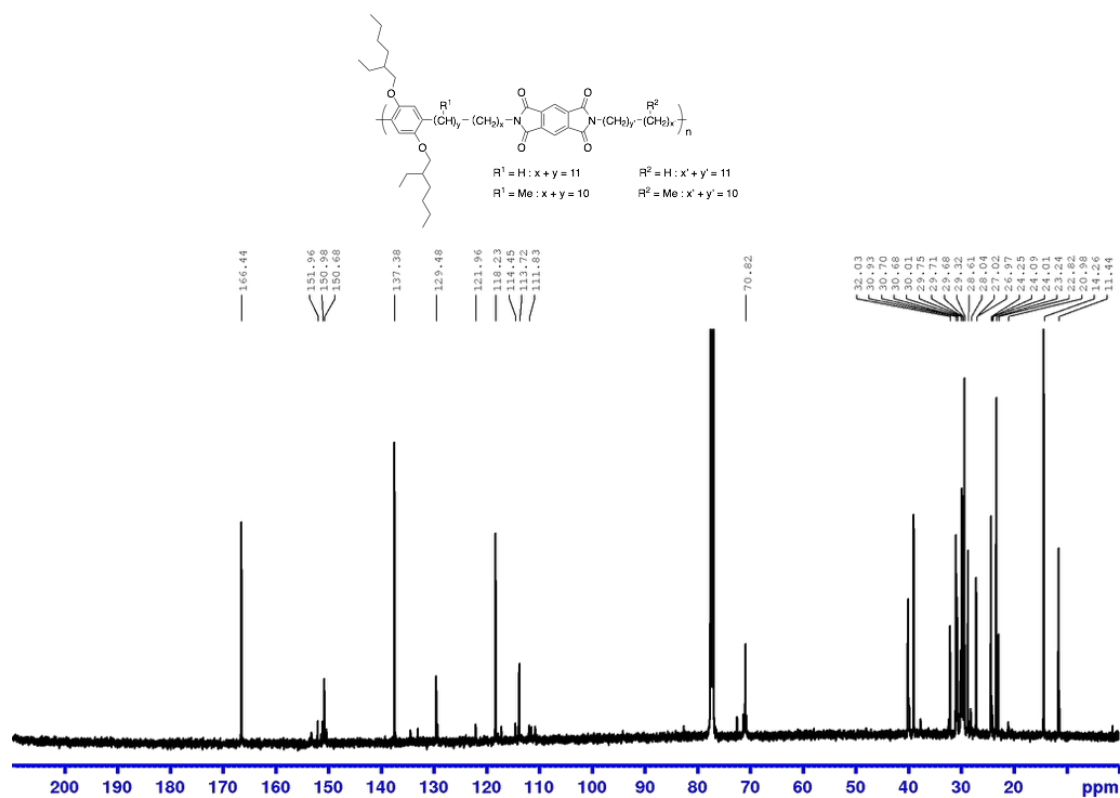

**Figure S9.**  $^{13}C\{^1H\}$  NMR spectrum of poly(1c-IA-H) (125 MHz,  $CDCl_3$ , r.t.).

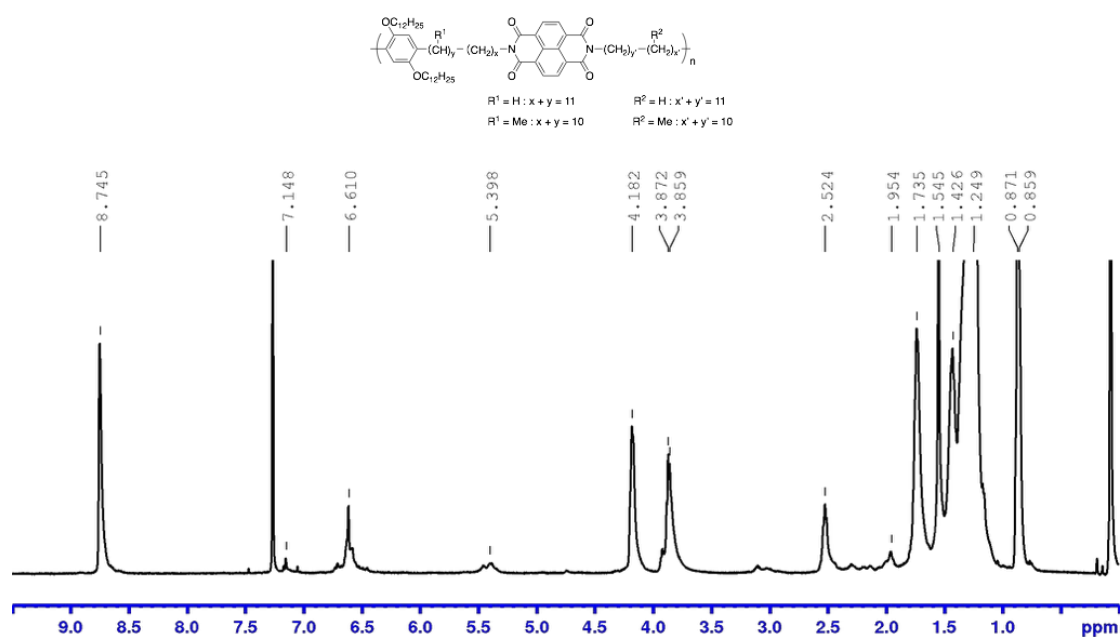

**Figure S10.**  $^1\text{H}$  NMR spectrum of poly(**1a-IIA-H**) (500 MHz,  $\text{CDCl}_3$ , r.t.).

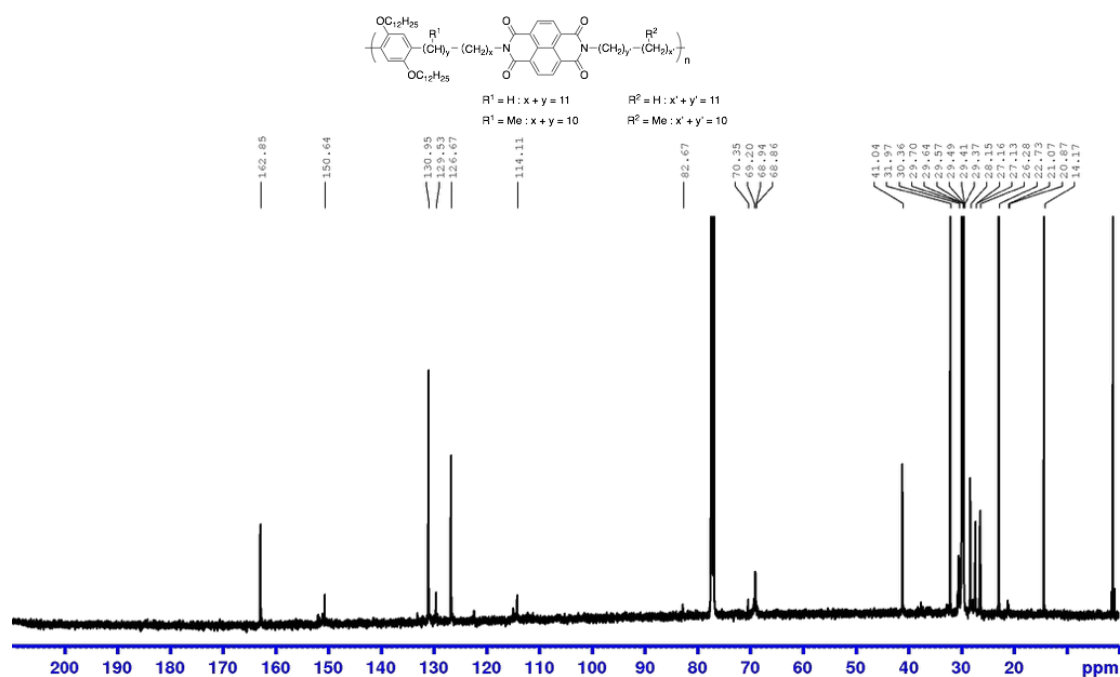

**Figure S11.**  $^{13}\text{C}\{^1\text{H}\}$  NMR spectrum of poly(**1a-IIA-H**) (125 MHz,  $\text{CDCl}_3$ , r.t.).

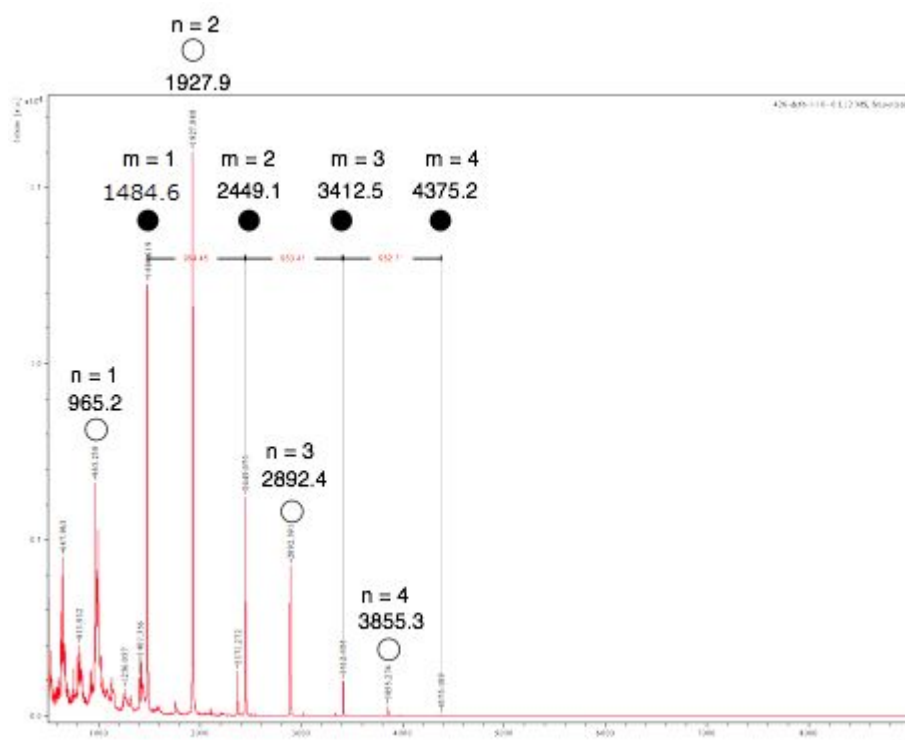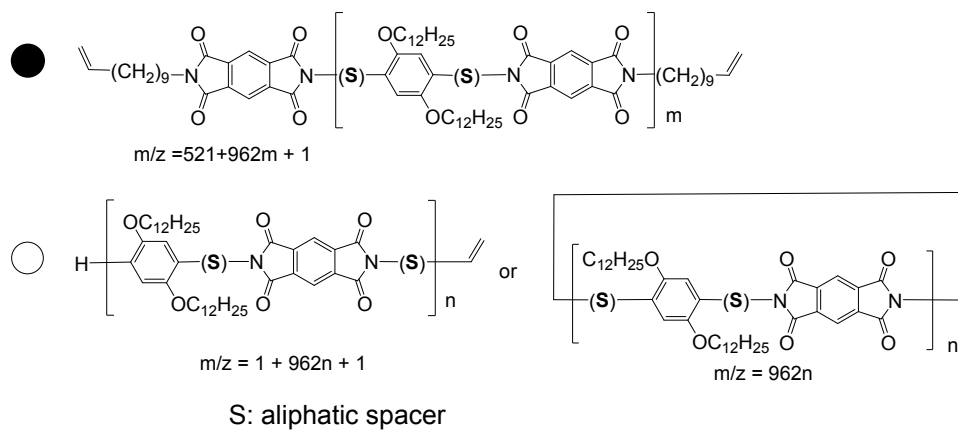

**Figure S12.** MALDI-TOF Mass of poly(**1a-1A**) (10 mg/mL polymer samples in THF solution with 10 mg/mL DCTB as matrix). Contents of the cyclic oligomers were not determined because of the absence for the information of the isotope pattern.



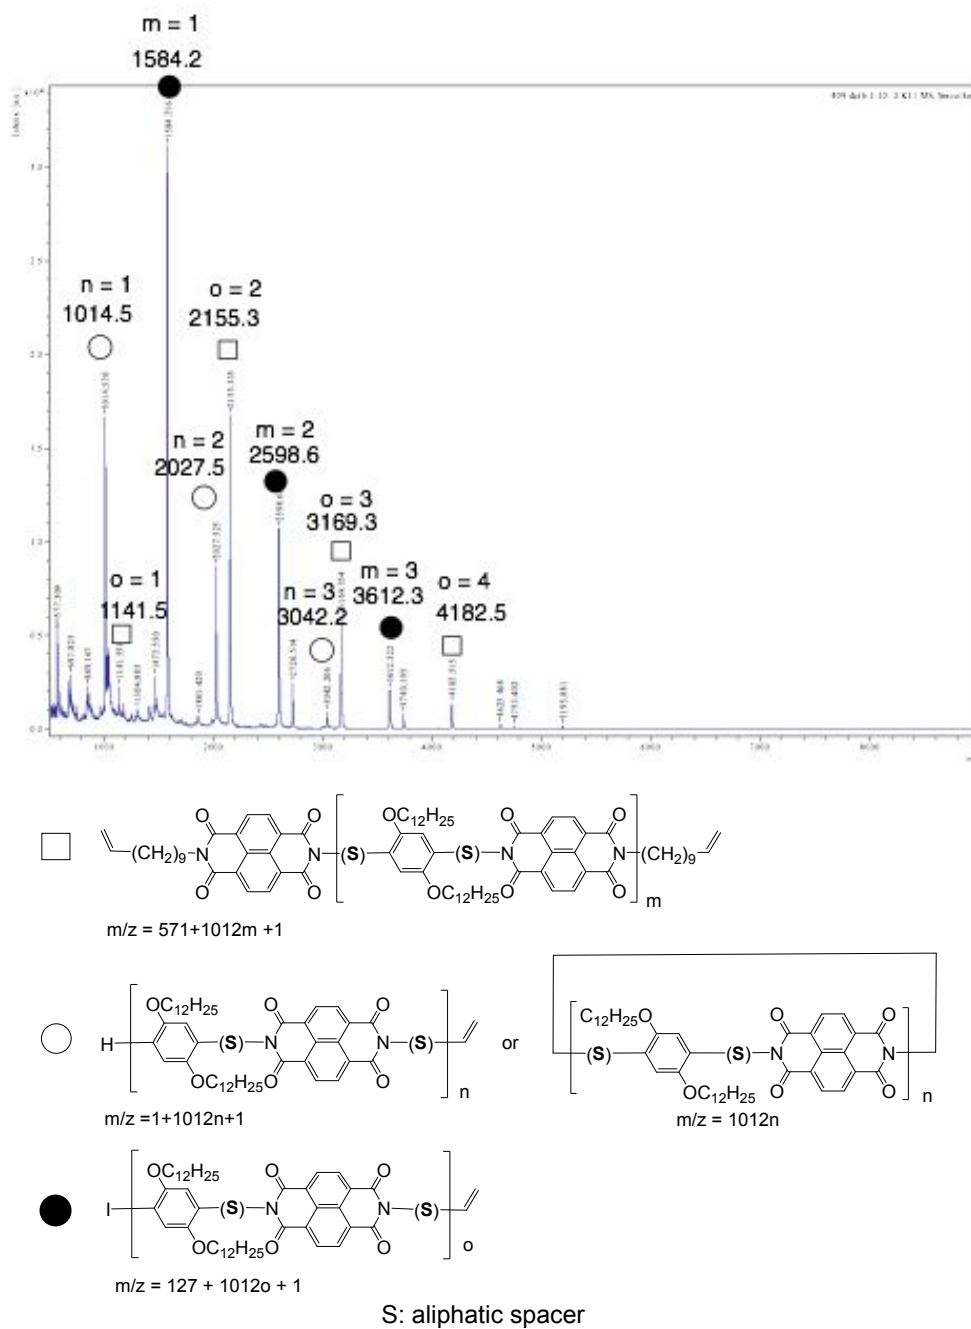

**Figure S13.** MALDI-TOF Mass of poly(**1a-IIA**) (10 mg/mL polymer samples in THF solution with 10 mg/mL DCTB as matrix). Contents of the cyclic oligomers were not determined because of the absence for the information of the isotope pattern.

# ESI-MASS for poly(**1a-IA**)

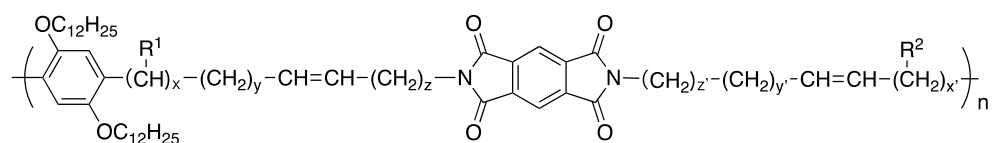

$$\text{R}^1 = \text{H} : x + y + z = 9$$

$$\text{R}^2 = \text{H} : x' + y' + z' = 9$$

$$\text{R}^1 = \text{Me} : x + y + z = 8$$

$$\text{R}^2 = \text{Me} : x' + y' + z' = 8$$

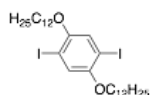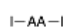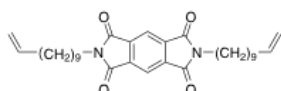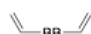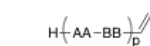

$$m/z = 1 + 1 + 962p + 23$$

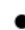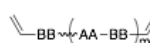

$$m/z = 520 + 1 + 962m + 23$$

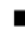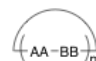

$$m/z = 962n + 23$$

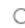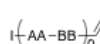

$$m/z = 127 + 1 + 962o + 23$$

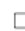

## Display Report

### Analysis Info

Analysis Name D:\Data\osakada\tan\181022\426-000001.d  
Method esi\_posi\_low.m  
Sample Name 426-  
Comment

Acquisition Date 2018/10/19 10:09:33

Operator BDAL@DE

Instrument micrOTOF 213750.10321

### Acquisition Parameter

|             |            |                      |          |                  |           |
|-------------|------------|----------------------|----------|------------------|-----------|
| Source Type | ESI        | Ion Polarity         | Positive | Set Nebulizer    | 0.3 Bar   |
| Focus       | Not active |                      |          | Set Dry Heater   | 180 °C    |
| Scan Begin  | 50 m/z     | Set Capillary        | 4500 V   | Set Dry Gas      | 4.0 l/min |
| Scan End    | 2500 m/z   | Set End Plate Offset | -500 V   | Set Divert Valve | Waste     |

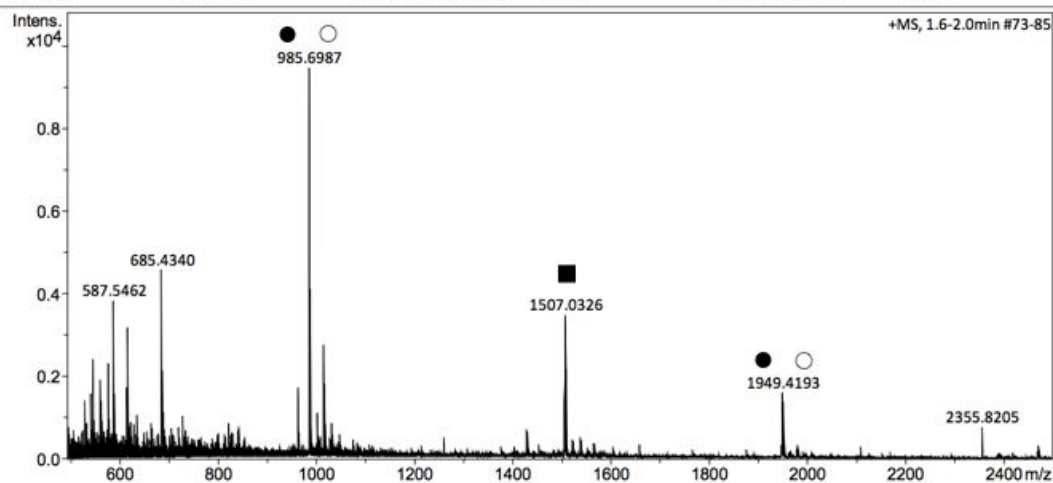

**Figure S14.** (a)ESI-MS spectrum of poly(**1a-IA**) ( $M_n = 7600$ , PDI = 4.6 by GPC).

## Display Report

### Analysis Info

Analysis Name D:\Data\osakada\lan\181022\426-000001.d  
 Method esi\_posi\_low.m  
 Sample Name 426-  
 Comment

Acquisition Date 2018/10/19 10:09:33

Operator BDAL@DE  
 Instrument micrOTOF 213750.10321

### Acquisition Parameter

|             |            |                      |          |                  |           |
|-------------|------------|----------------------|----------|------------------|-----------|
| Source Type | ESI        | Ion Polarity         | Positive | Set Nebulizer    | 0.3 Bar   |
| Focus       | Not active |                      |          | Set Dry Heater   | 180 °C    |
| Scan Begin  | 50 m/z     | Set Capillary        | 4500 V   | Set Dry Gas      | 4.0 l/min |
| Scan End    | 2500 m/z   | Set End Plate Offset | -500 V   | Set Divert Valve | Waste     |

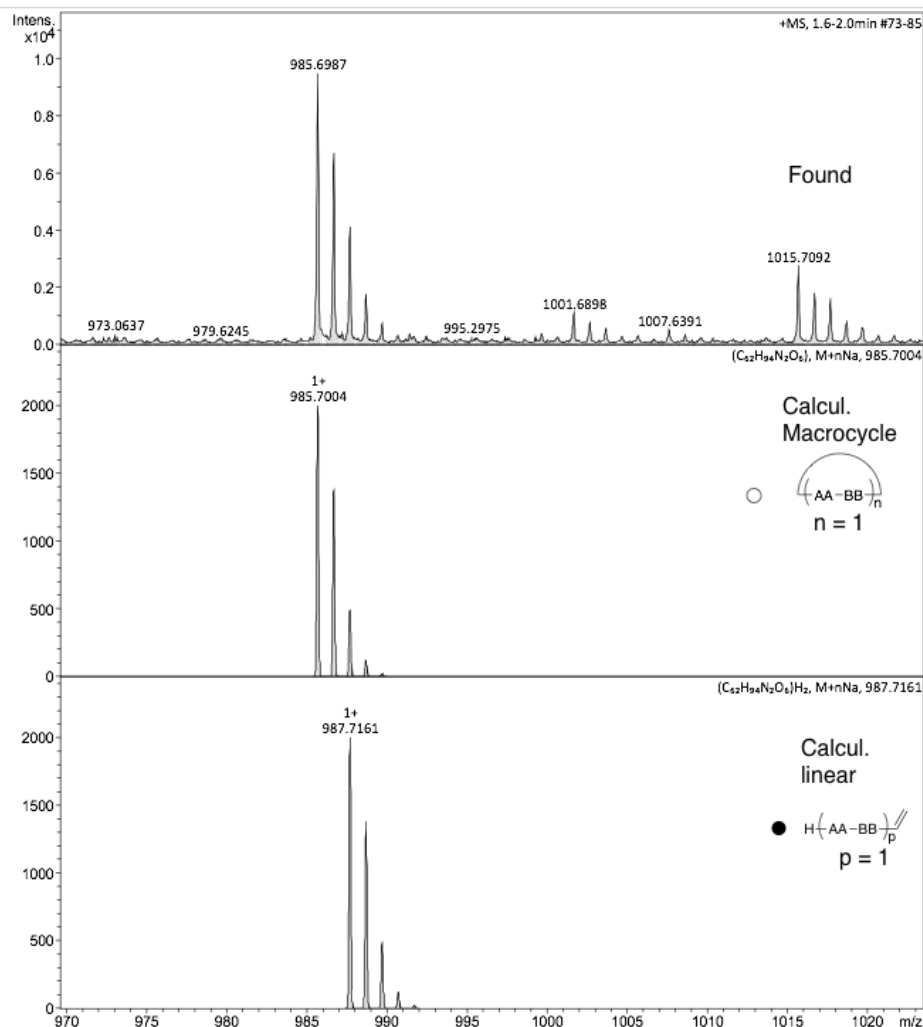

Bruker Compass DataAnalysis 4.2

printed: 2018/10/22 12:14:35

by: BDAL@DE

1 of 1

**Figure S14.** (b) Observed and simulated isotope pattern for 1:1 adduct of **1a** and **IA**.  $Na^+$  is derived from the ion source, sodium trifluoroacetate.

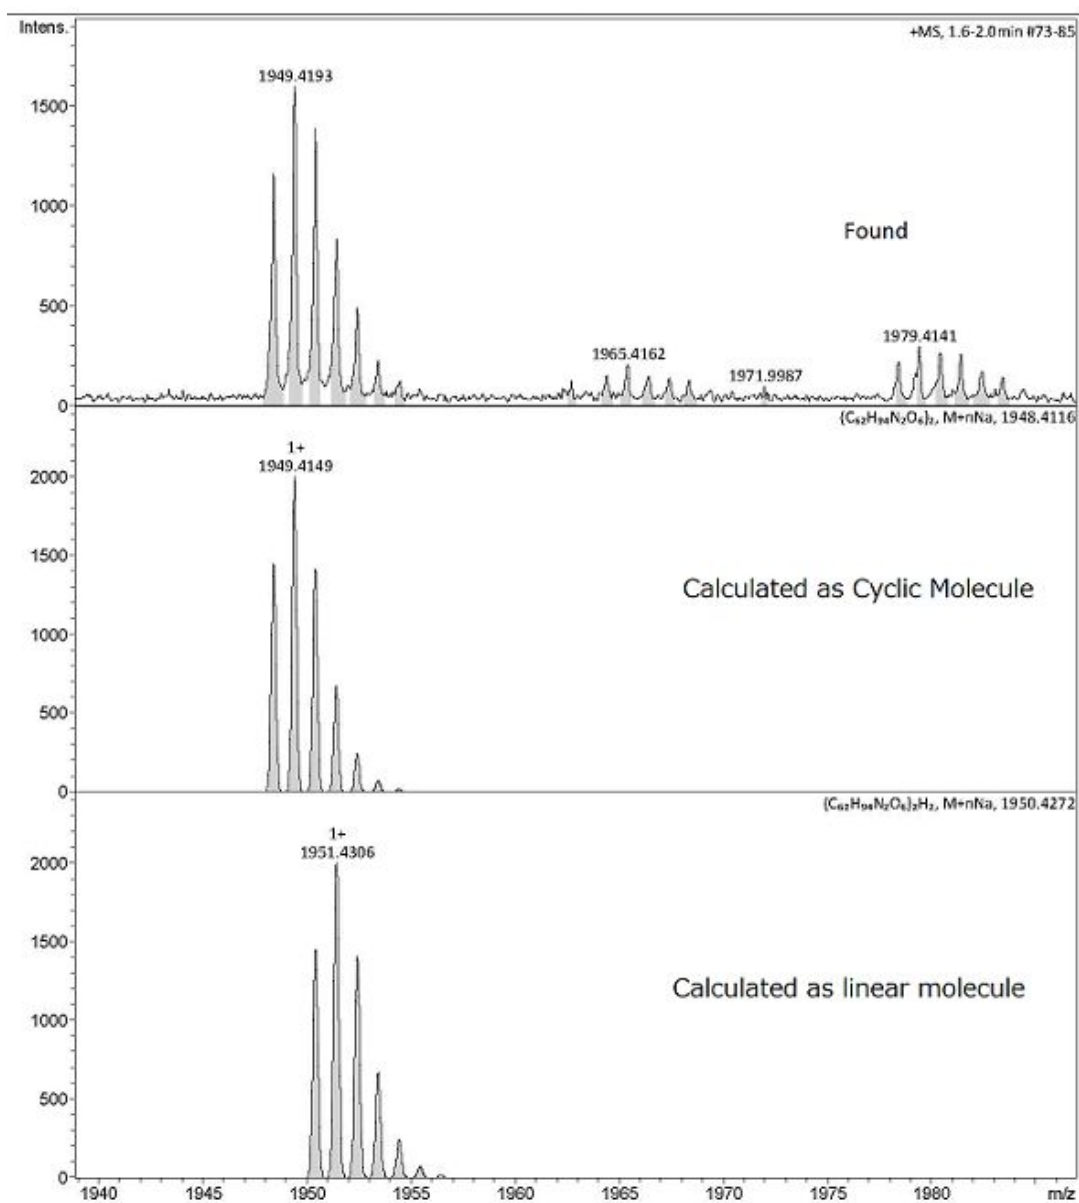

**Figure S14.** (c) Observed and simulated isotope pattern for 2:2 adduct of **1a** and **IA**.

### (a) Observed (total) TDCMAS ESI-TOF

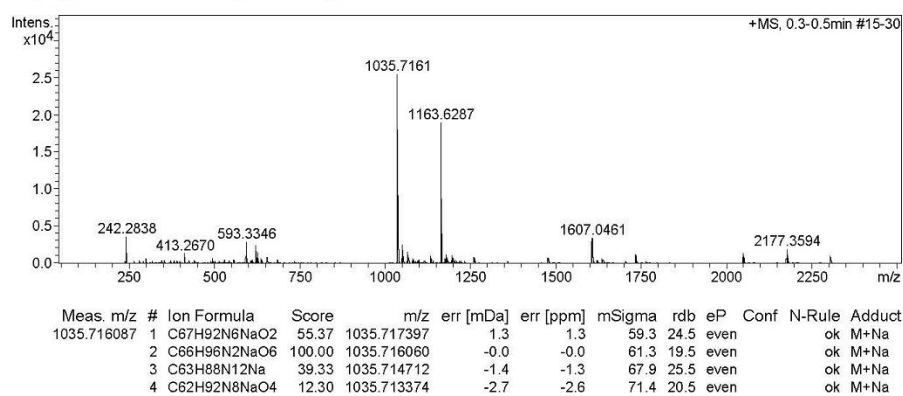

### (b) Peaks of 1:1 adduct TDCMAS ESI-TOF

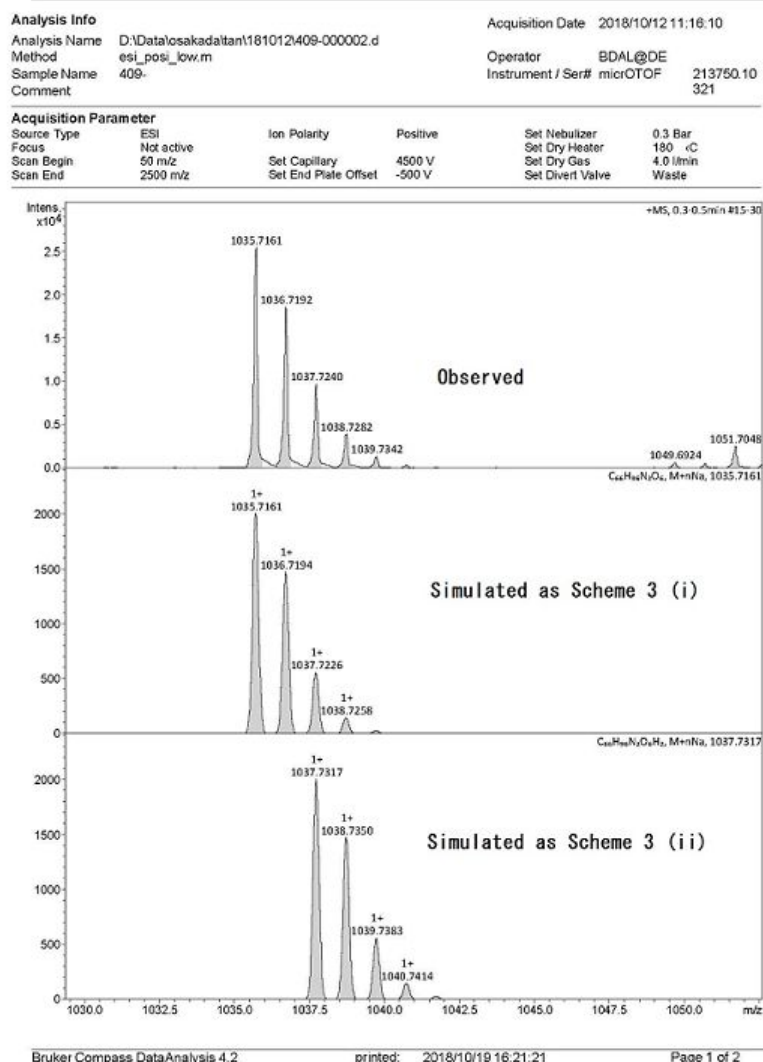

**Figure S15.** (a) ESI-MS spectrum of poly(**1a-IIA**) ( $M_n = 3800$ , PDI = 1.7 by GPC). (b) Observed and simulated isotope pattern for 1:1 adduct of **1a** and **IIA**. Na<sup>+</sup> is derived from the ion source, sodium trifluoroacetate.

### (c) Peaks of 2:2 adducts TDCMAS ESI-TOF

|                      |                                        |                                      |                    |
|----------------------|----------------------------------------|--------------------------------------|--------------------|
| <b>Analysis Info</b> |                                        | Acquisition Date 2018/10/12 11:16:10 |                    |
| Analysis Name        | D:\Data\osakada\ten181012\409-000002.d | Operator                             | BDAL@DE            |
| Method               | esi_posi_low.m                         | Instrument / Ser#                    | microTOF 213750.10 |
| Sample Name          | 409-                                   |                                      | 321                |
| Comment              |                                        |                                      |                    |

|                              |            |                      |          |                  |           |
|------------------------------|------------|----------------------|----------|------------------|-----------|
| <b>Acquisition Parameter</b> |            |                      |          |                  |           |
| Source Type                  | ESI        | Ion Polarity         | Positive | Set Nebulizer    | 0.3 Bar   |
| Focus                        | Not active |                      |          | Set Dry Heater   | 180 °C    |
| Scan Begin                   | 50 m/z     | Set Capillary        | 4500 V   | Set Dry Gas      | 4.0 l/min |
| Scan End                     | 2500 m/z   | Set End Plate Offset | -500 V   | Set Divert Valve | Waste     |

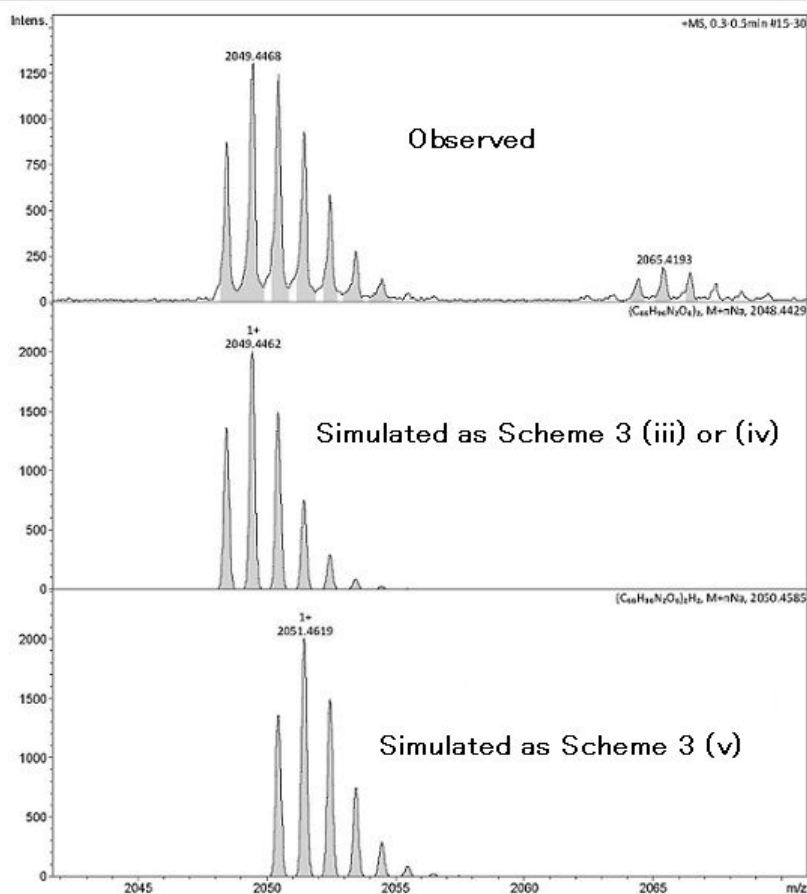

**Figure S15.** (c) Observed and simulated isotope pattern for 2:2 adduct of **1a** and **IIA**.

## Correlation Function

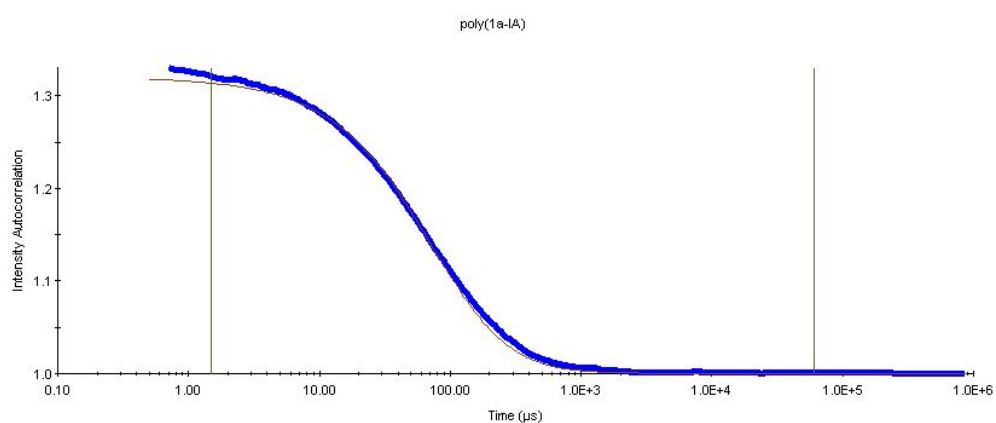

## Regularization results

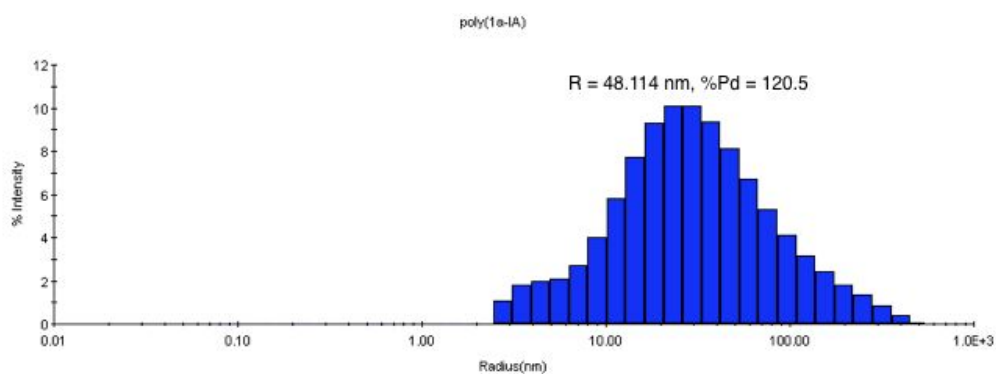

The DynaPro NanoStar of Wyatt Technology Corporation was used for the

**Figure S16.** Results of light scattering measurement for poly(**1a-IC**).

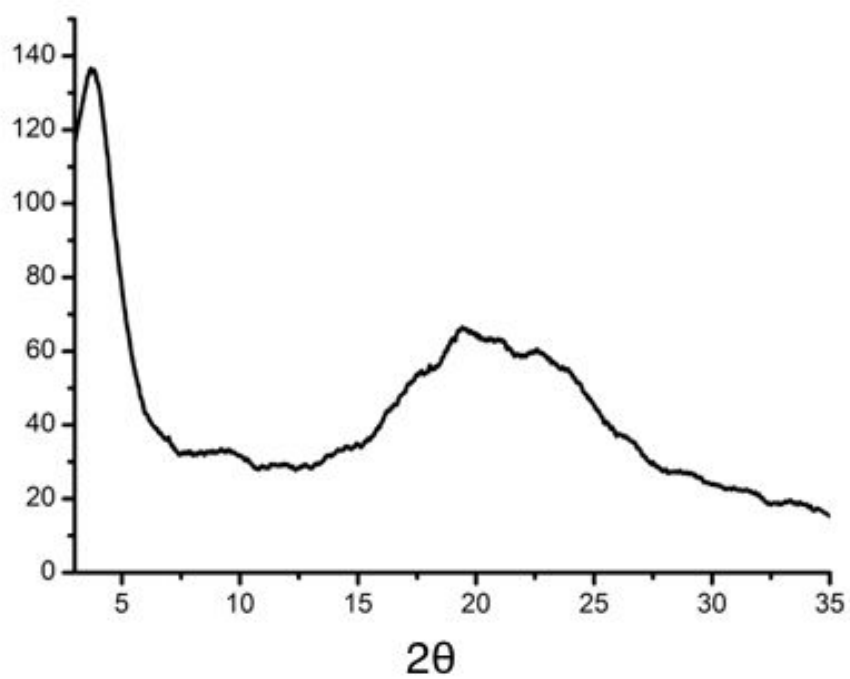

**Figure S17.** WAXRD for poly(**1a-IC**).
